# Supplementary material for: Sevoflurane postconditioning protects the myocardium against ischemia/reperfusion injury via activation of the JAK2–STAT3 pathway
Source: PeerJ. 2017 Apr 4;5:e3196. doi: 10.7717/peerj.3196 (PMC5382923; doi:10.7717/peerj.3196)
Supplement: Supplemental Information 1 — Raw data for cardiac function indicators, myocardial infarction area, the level of LDH release, the levels of p-JAK2, p-STAT3, Bcl-2 and Bax, myocardial energy metabolism and mitochondrial ROS production rates. [file peerj-05-3196-s001.xlsx]

## Sheet: Sheet1
Cardiac function
HR
Sham	I/R	S-post	AG490	S-post+AG490
265.077	249.438	266.865	244.542	261.436
260.947	254.768	250.424	246.572	249.368
261.355	263.146	259.134	263.053	280.357
255.284	269.984	261.341	271.577	255.579
270.078	256.345	269.642	259.785	254.538
262.88	238.08	264.784	237.266	252.358
254.517	246.445	249.343	247.664	247.956
264.684	248.652	269.459	248.843	241.631
261.635	242.546	256.871	231.557	242.26
242.266	249.544	255.595	251.537	245.325
266.871	246.652	244.787	247.767	242.546
242.077	242.655	266.101	248.847	247.237
LVDP
Sham	I/R	S-post	AG490	S-post+AG490
67.43	45.34	61.76	51.34	45.35
75.87	50.95	62.34	47.56	54.57
68.65	41.54	51.76	51.57	43.54
77.81	43.76	54.34	51.76	41.76
71.29	61.32	52.28	51.57	61.43
59.55	39.65	51.33	45.76	41.76
68.01	44.09	70.34	44.51	39.35
66.37	43.78	60.73	42.84	41.76
74.61	43.86	51.34	61.54	43.56
78.54	41.87	56.97	51.28	40.65
69.65	46.86	55.34	41.69	44.38
78.55	55.12	71.87	41.46	56.65
LVEDP
Sham	I/R	S-post	AG490	S-post+AG490
10.873	14.2352	13.4267	14.5684	17.8345
10.0677	19.4236	8.6267	17.4265	16.6459
6.9043	15.5323	13.7824	17.6577	19.2456
7.0143	17.5252	9.9653	16.5437	17.2546
10.1686	13.6452	13.5687	13.5471	13.5771
5.234	15.4626	12.9465	15.5589	16.8578
7.2306	19.5725	13.4467	18.5456	15.2465
5.4423	15.3489	11.5738	17.7342	15.3573
11.2983	17.6262	11.5788	19.2562	17.1342
7.2647	18.6267	8.7681	16.2015	15.9547
8.5627	15.8467	11.4657	17.8458	14.3426
8.9301	17.1627	9.468	16.1227	18.247
dp/dt
Sham	I/R	S-post	AG490	S-post+AG490
2986.26	1593.68	2210.29	1575.64	1668.14
2592.98	1368.76	2450.22	1389.75	1535.44
2690.54	1698.74	2192.69	1743.45	1518.44
2313.45	1555.87	2294.95	1545.54	1825.87
2914.44	1789.73	2331.02	1801.75	1918.73
2813.75	1191.71	2109.37	1231.44	2085.53
2718.64	2218.02	2441.47	2218.55	1703.23
2812.5	1393.23	2489.64	1403.23	1603.35
2667.45	1713.86	2166.86	1703.55	1837.15
2719.81	1907.59	1849.24	1918.43	1896.24
2557.88	1292	2298.23	1381.95	1816.13
2216.86	1911.98	2669.54	1968.54	1465.79
Myocardial infarction area
Sham	I/R	S-post	AG490	S-post+AG490
3.01	52.54	24.16	57.35	56.46
7.29	49.18	27.29	51.54	50.65
6.1	61.29	24.37	50.23	49.18
7.24	50.37	29.42	52.16	49.32
5.31	51.26	33.61	55.76	53.67
LDH
Sham	I/R	S-post	AG490	S-post+AG490
139.32	498.76	307.37	489.56	479.45
134.19	429.45	267.91	480.23	420.28
103.82	509.17	224.28	480.13	501.23
109.36	491.87	294.13	512.36	469.39
205.67	515.54	279.86	509.64	541.65
166.01	477.65	235.72	498.31	467.3
101.35	491.76	307.37	489.57	478.56
149.17	428.33	267.91	440.22	416.22
189.78	507.21	224.28	511.15	501.16
109.55	491.28	294.13	488.38	474.27
169.61	515.87	279.86	549.64	501.66
86.01	479.43	235.72	481.31	468.89
JAK2
Sham	I/R	S-post	AG490	S-post+AG490
0.19	0.42	1.01	0.51	0.47
0.11	0.51	1.13	0.49	0.41
0.16	0.41	1.19	0.52	0.41
0.19	0.53	1.04	0.47	0.5
0.12	0.47	1.11	0.44	0.47
STAT3
Sham	I/R	S-post	AG490	S-post+AG490
0.14	0.43	1.36	0.33	0.32
0.11	0.41	1.43	0.37	0.35
0.13	0.36	1.39	0.36	0.36
0.11	0.36	1.41	0.33	0.3
0.15	0.31	1.21	0.35	0.29
Bcl-2
Sham	I/R	S-post	AG490	S-post+AG490
0.13	0.38	1.42	0.35	0.33
0.22	0.38	1.61	0.44	0.31
0.21	0.29	1.23	0.29	0.32
0.19	0.42	1.54	0.31	0.28
0.18	0.36	1.28	0.33	0.43
Bax
Sham	I/R	S-post	AG490	S-post+AG490
0.31	1.46	0.56	1.39	1.29
0.29	1.43	0.53	1.52	1.36
0.23	1.33	0.71	1.33	1.4
0.25	1.49	0.63	1.33	1.26
0.29	1.39	0.49	1.37	1.35
ATP
Sham	I/R	S-post	AG490	S-post+AG490
7.92	3.01	5.91	3.27	3.12
7.55	2.68	5.52	2.83	2.77
8.26	3.33	5.65	3.37	3.45
7.56	2.57	5.48	2.82	2.39
8.31	3.34	6.21	3.47	3.67
7.61	2.85	5.46	2.91	2.41
ROS
Sham	I/R	S-post	AG490	S-post+AG490
5.92	11.01	8.91	13.27	13.12
8.55	12.68	9.52	12.83	12.77
9.26	13.33	11.65	13.37	13.45
5.56	12.57	8.48	12.82	12.39
6.31	13.34	8.21	13.47	13.67
7.61	15.85	9.46	12.91	12.41
